# Supplementary material for: Temperamental Development among Preterm Born Children. An RCT Follow-up Study
Source: MDPI journal article supplement (doi:10.3390/children7040036), 2020-04-23
Supplement: s1 [file s1]

# Supplementary Materials:

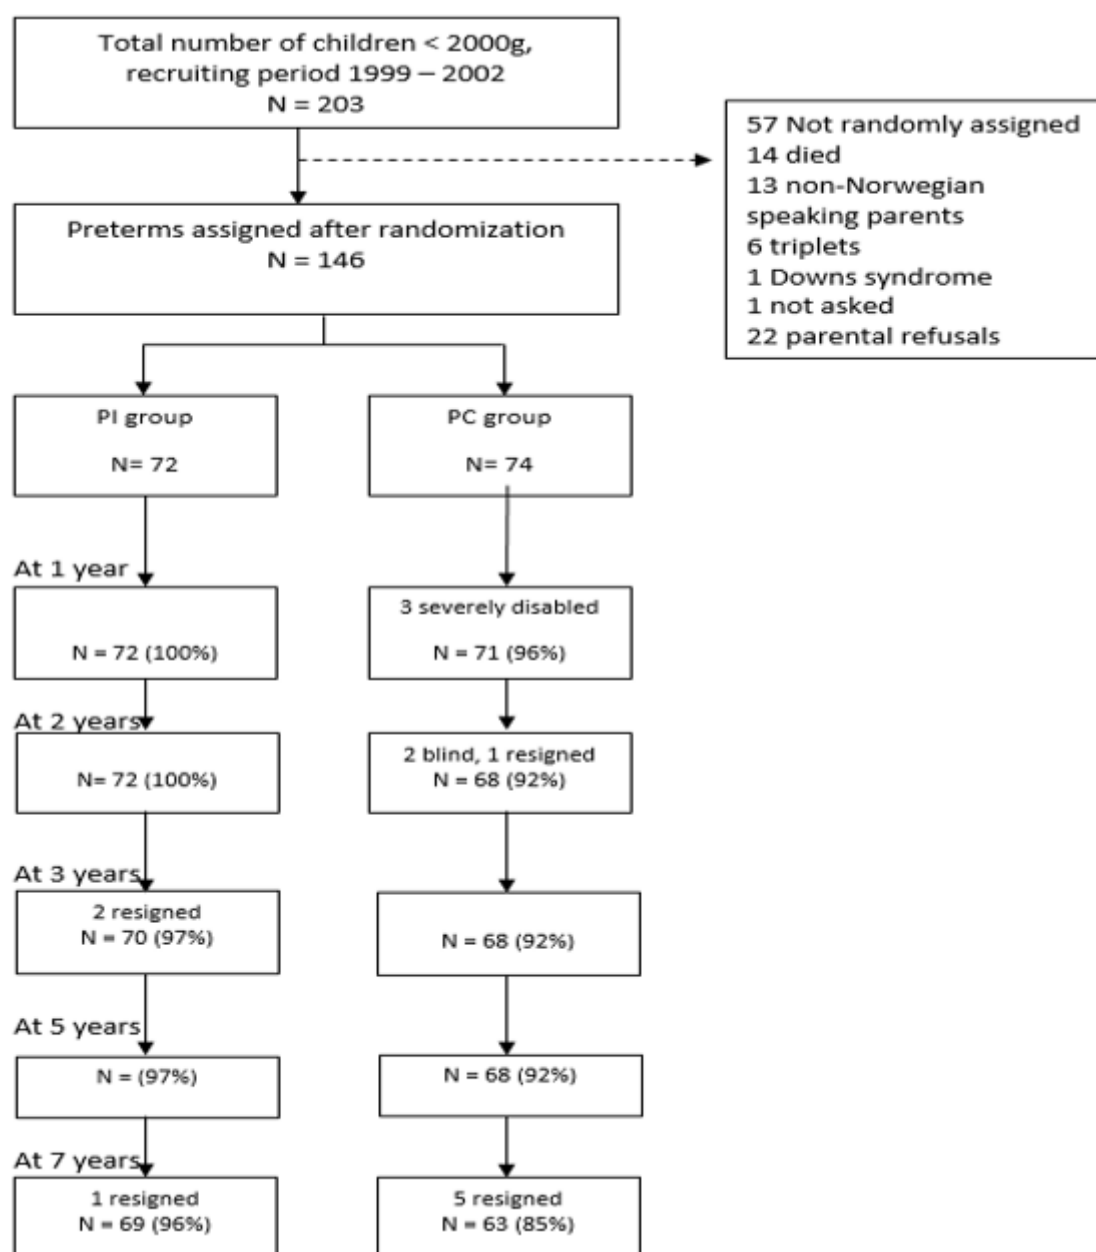

**Figure S1.** Tromsø Intervention Study on Preterms (TISP). Flow of participants in the two groups with preterm born infants from recruitment until age seven.

**Table S1.** Fixed effects of time and group-belonging on mothers reports on five temperament dimensions.

|                    | Shyness               | Sociality             | Emotionality          | Activity                 | Soothability              |
|--------------------|-----------------------|-----------------------|-----------------------|--------------------------|---------------------------|
| Time               | F(1,115) < 0.1<br>ns. | F(1,116) = 2.2<br>ns. | F(1,111) = 5.1 *      | F(1,116) = 60.9<br>***   | F(1,115) = 2.7 ns.        |
| Group              | F(1,124) < 0.1<br>ns. | F(1,119) = 0.6<br>ns. | F(1,121) = 9.7 **     | F(1,120) = 1.8 ns        | F(1,120) = 3.7 ns.<br>[2] |
| Time x group       | F(1,115) = 0.4<br>ns. | F(1,116) = 0.1<br>ns. | F(1,111) = 1.8<br>ns. | F(1,116) = 3.6 ns<br>[3] | F(1,115) = 0.5 ns.        |
| Tot. Stress<br>[1] | F(1,125) = 9.2<br>**  | F(1,122) = 7.8<br>**  | F(1,126) = 8.3 **     | F(1,128) = 6.3 *         | F(1,128) = 25.2 ***       |
| Years educ.        | F(1,123) = 1.6<br>ns. | F(1,119) = 0.4<br>ns. | F(1,122) = 1.2<br>ns. | F(1,116) = 0.1 ns.       | F(1,121) = 1.1 ns.        |

ns.  $p > 0.05$ , \*  $p < 0.05$ , \*\*  $p < 0.01$ , \*\*\*  $p < 0.001$ , non-significant results toned down. [1]: PSI, total stress reported by mothers at children's age of 1 year [2]:  $p = 0.056$  [3]:  $p = 0.06$ .

**Table S2.** Fixed effects of time and group-belonging on fathers reports on five temperament dimensions.

|                  | <b>Shyness</b>       | <b>Sociality</b>     | <b>Emotionality</b> | <b>Activity</b>      | <b>Soothability</b>   |
|------------------|----------------------|----------------------|---------------------|----------------------|-----------------------|
| Time             | $F(1,93) < 0.1$ ns.  | $F(1,93) < 0.1$ ns.  | $F(1,94) = 1.3$ ns. | $F(1,91) = 61.7$ *** | $F(1,95) = 0.3$ ns.   |
| Group            | $F(1,100) = 0.2$ ns. | $F(1,102) = 0.5$ ns. | $F(1,98) = 0.6$ ns. | $F(1,98) = 0.7$ ns.  | $F(1,100) = 14.2$ *** |
| Time x Group     | $F(1,94) = 0.4$ ns.  | $F(1,93) < 0.1$ ns.  | $F(1,94) = 4.8$ *   | $F(1,91) = 0.3$ ns.  | $F(1,95) = 1.7$ ns.   |
| Total stress [1] | $F(1,99) = 7.5$ **   | $F(1,99) = 27.1$ *** | $F(1,99) = 9.5$ **  | $F(1,98) = 1.9$ ns.  | $F(1,98) = 3.8$ ns.   |
| Years educ.      | $F(1,100) < 0.1$ ns. | $F(1,98) < 0.1$ ns.  | $F(1,101) = 4.7$ *  | $F(1,99) = 0.7$ ns.  | $F(1,98) = 0.2$ ns.   |

ns.  $p > 0.05$ , \*  $p < 0.05$ , \*\*  $p < 0.01$ , \*\*\*  $p < 0.001$ , non-significant results toned down. [1]: PSI, total stress reported by fathers at children's age of 1 year.
